# Supplementary material for: Newborn Screening for Fabry Disease in Northeastern Italy: Results of Five Years of Experience
Source: MDPI journal article supplement (doi:10.3390/biom11070951), 2021-06-27
Supplement: s1 [file s1]

**Table S1:** Follow up of patients detected by newborn screening for Fabry disease

| Case | Age at last visit | Clinical evaluation (angiokeratomas, hypohidrosis, gastrointestinal symptoms, limb pain) | Heart examination | Electrocardiogram | eGFR (Schwartz formula) | Uprot/Ucrea (mg/mmol) | Microalbuminuria (mg/g creatinine) |
|------|-------------------|------------------------------------------------------------------------------------------|-------------------|-------------------|-------------------------|-----------------------|------------------------------------|
| 1    | 5.5 yrs           | Normal                                                                                   | Normal            | Normal            | 222.94                  | 18.75                 | 7.1                                |
| 2    | 4.5 yrs           | Normal                                                                                   | Normal            | Normal            | 136.86                  | 20.62                 | 2.6                                |
| 3    | 4.5 yrs           | Normal                                                                                   | Normal            | Normal            | 158.12                  | 16.12                 | 20                                 |
| 4    | 4.5 yrs           | Normal                                                                                   | Normal            | Normal            | 162.17                  | 17.34                 | 4.6                                |
| 5    | LOST TO FOLLOW-UP |                                                                                          |                   |                   |                         |                       |                                    |
| 6    | 4.5 yrs           | Normal                                                                                   | Normal            | Normal            | 166.52                  | 8.94                  | 11.6                               |
| 7    | 4 yrs             | Normal                                                                                   | Normal            | Normal            | 123.45                  | 13.95                 | 3.6                                |
| 8    | 4 yrs             | Normal                                                                                   | Normal            | Normal            | 163.28                  | NA                    | NA                                 |
| 9    | 4 yrs             | Normal                                                                                   | Normal            | Normal            | 166.66                  | 23.67                 | 9.6                                |
| 10   | 4 yrs             | Normal                                                                                   | Normal            | Normal            | 140.25                  | 10.04                 | 20.12                              |
| 11   | 3.5 yrs           | Normal                                                                                   | Normal            | Normal            | 148.08                  | 19.94                 | 13.4                               |
| 12   | 3.5 yrs           | Normal                                                                                   | Normal            | Normal            | 128.75                  | 18.51                 | 5.3                                |
| 13   | 3 yrs             | Normal                                                                                   | Normal            | Normal            | 184.64                  | NA                    | NA                                 |
| 14   | LOST TO FOLLOW-UP |                                                                                          |                   |                   |                         |                       |                                    |
| 15   | 2.5 yrs           | Normal                                                                                   | Normal            | Normal            | 128.56                  | 31                    | 13.7                               |
| 16   | 2 yrs             | Normal                                                                                   | Normal            | Normal            | 184.8                   | 58.13                 | 40.1                               |

|    |         |        |        |        |        |       |      |
|----|---------|--------|--------|--------|--------|-------|------|
| 17 | 1 yr    | Normal | Normal | Normal | 130    | 44.64 | 36.4 |
| 18 | 1.5 yrs | Normal | Normal | Normal | 168.67 | 22.47 | 31.1 |
| 19 | 1.5 yrs | Normal | Normal | Normal | 157.14 | NA    | NA   |
| 20 | 1 yr    | Normal | Normal | Normal | 185    | NA    | NA   |
| 21 | 10 days | Normal | Normal | Normal | 71.71  | 7.19  | 20.8 |
| 22 | 6 m     | Normal | Normal | Normal | 110    | 26.74 | 16.5 |

Abbreviations: yrs: years; m: month; eGFR: estimated glomerular filtration rate; Uprot/Ucrea: U protein/U creatinine; NA: not available.
